# Supplementary material for: Rational design of MoS2-supported Cu single-atom catalysts by machine learning potential for enhanced peroxidase-like activity
Source: Royal Society of Chemistry journal article supplement (doi:10.1039/d2nr07270j), 2023-01-01
Supplement: d2nr07270j1.pdf [file d2nr07270j1.pdf]

## **Rational design of MoS<sub>2</sub> supported Cu single atom catalysts by machine learning potential for enhanced peroxidase-like activity**

Deting Xu<sup>a,b</sup>, Wenyan Yin<sup>a</sup>, Jie Zhou<sup>a</sup>, Liyuan Wu<sup>a</sup>, Haodong Yao<sup>a</sup>, Minghui Sun<sup>a</sup>, Ping Chen<sup>a</sup>, Xiangwen Deng<sup>a</sup> and Lina Zhao<sup>\*a,b</sup>

---

<sup>a</sup> CAS Key Laboratory for Biomedical Effects of Nanomaterials and Nanosafety, Institute of High Energy Physics, Chinese Academy of Sciences, Beijing 100049, China.

<sup>b</sup> University of Chinese Academy of Sciences, Beijing 100049, China.

\* Corresponding Author: Lina Zhao, Email: [linazhao@ihep.ac.cn](mailto:linazhao@ihep.ac.cn)

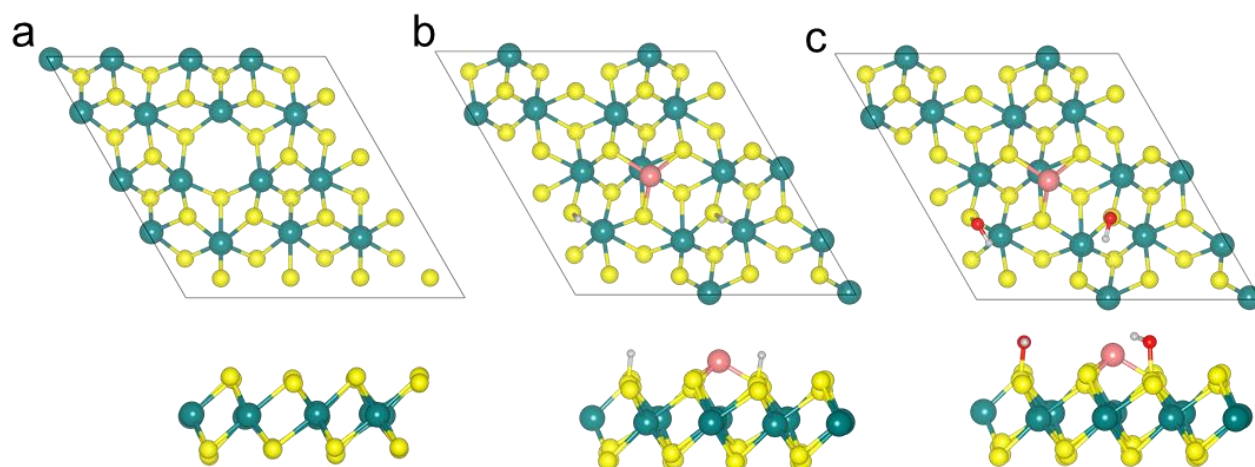

**Figure S1** Top and side view of different optimized geometries associated with MoS<sub>2</sub>. (a) MoS<sub>2</sub>-Vs, (b) Cu@MoS<sub>2</sub> in acid and (c) Cu@MoS<sub>2</sub> in basic conditions.

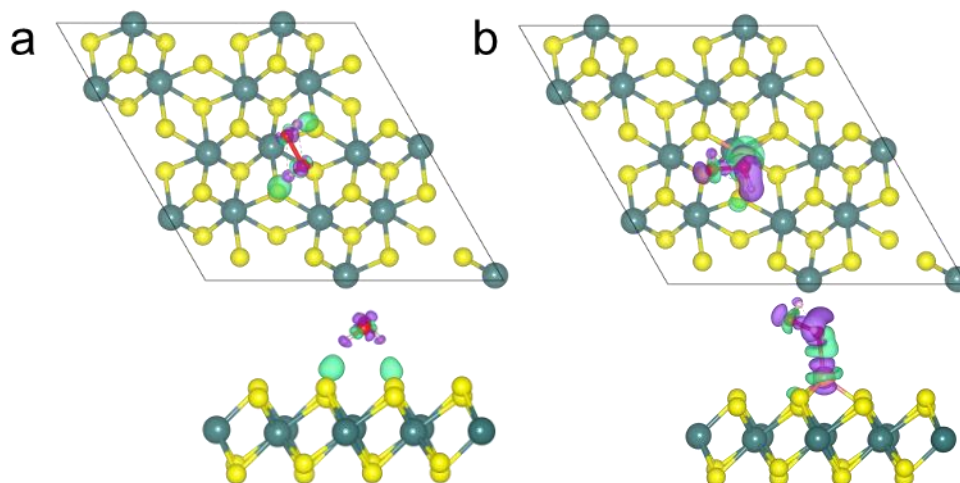

**Figure S2** Charge density difference plots for H<sub>2</sub>O<sub>2</sub> adsorbed surfaces of (a) pure MoS<sub>2</sub> and (b) Cu@MoS<sub>2</sub>. The isosurface value of electron density is taken as 0.002 e/Å<sup>3</sup>. The cyan and purple regions for the charge density difference represent the areas of electron accumulation and depletion, respectively.

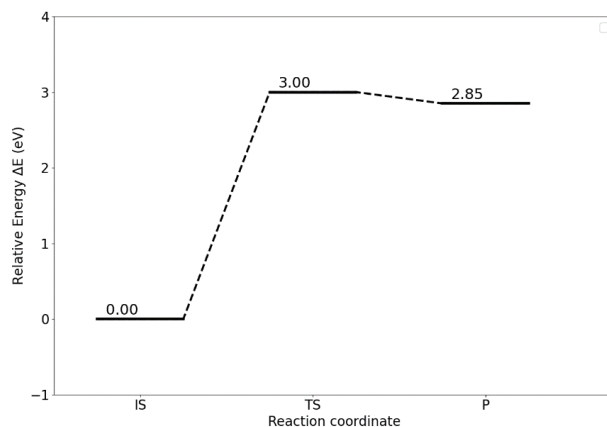

**Figure S3** Energy profile for decomposition of  $\text{H}_2\text{O}_2$  on pure  $\text{MoS}_2$ . The path shows  $\text{H}_2\text{O}_2$  decompose into  $\text{HOO}$  and  $\text{H}$ . The numbers represent the energy (eV) at each state. The abscissa IS, TS, and P represent reactants, transition states and products, respectively.

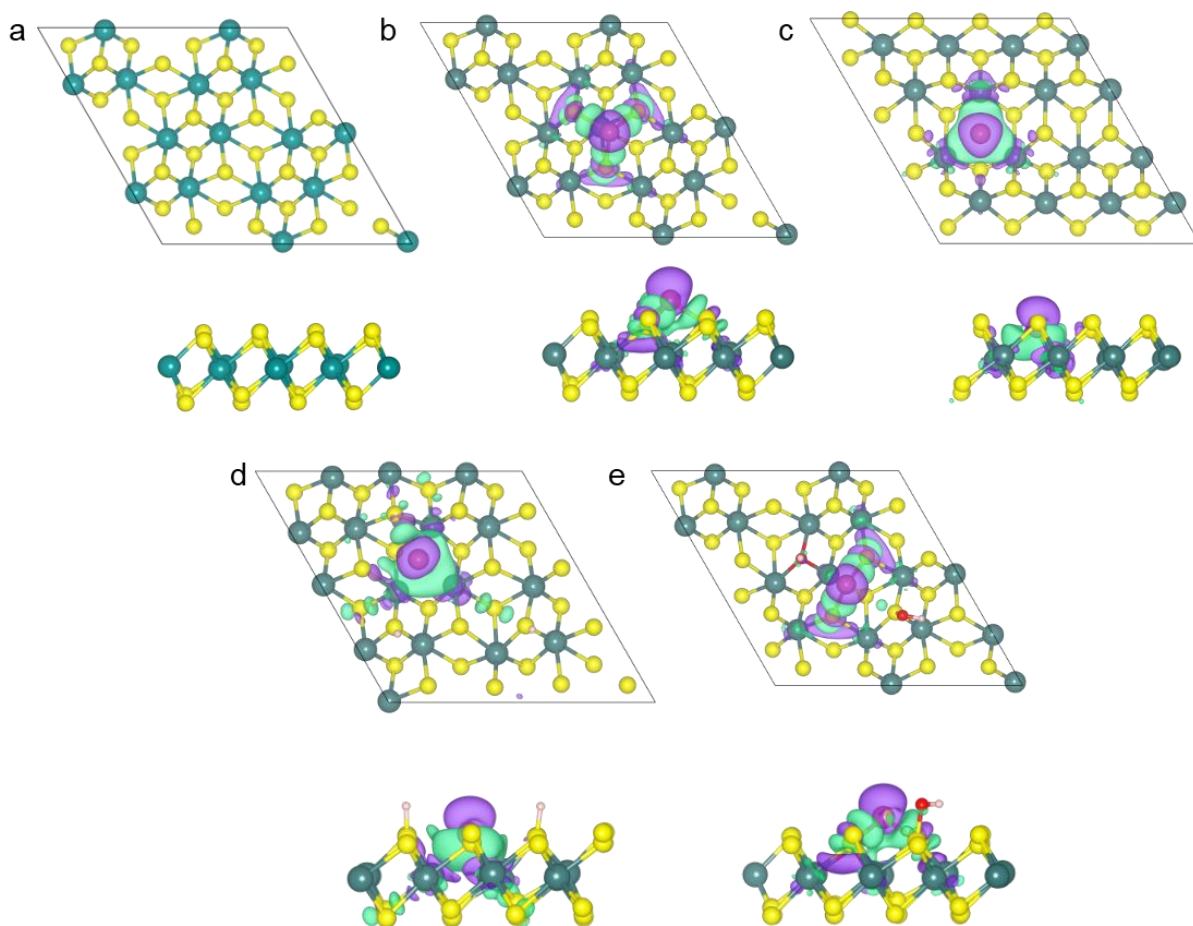

**Figure S4** Charge density difference plots for Cu adsorbed different  $\text{MoS}_2$  surfaces of (a) pure  $\text{MoS}_2$ , (b)  $\text{Cu@MoS}_2$ , (c)  $\text{Cu@MoS}_2\text{-Vs}$ , (d)  $\text{Cu@MoS}_2\text{-Vs}$  in acid and (e)  $\text{Cu@MoS}_2\text{-Vs}$  in basic. The isosurface value of electron density is taken as  $0.002 \text{ e}/\text{\AA}^3$ . The cyan and purple regions for the charge density difference represent the areas of electron accumulation and depletion, respectively.

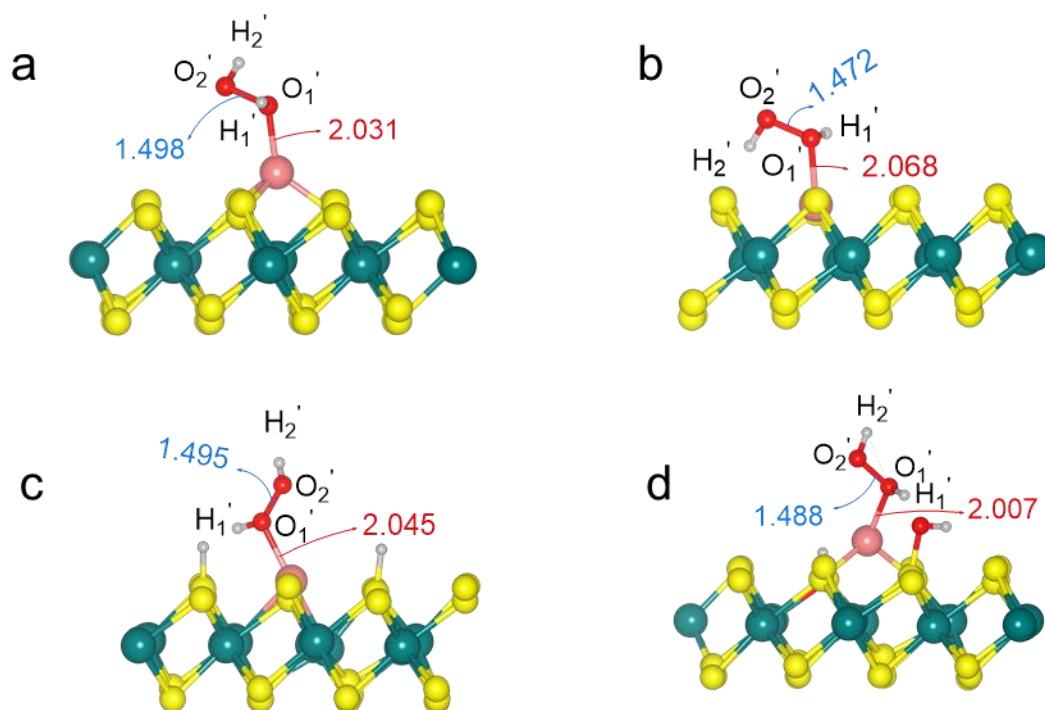

**Figure S5** The optimized geometrical structures of  $\text{H}_2\text{O}_2$  adsorption on (a)  $\text{Cu@MoS}_2$ , (b)  $\text{Cu@MoS}_2\text{-Vs}$ , (c)  $\text{Cu@MoS}_2\text{-Vs}$  in acid and (d)  $\text{Cu@MoS}_2\text{-Vs}$  in basic conditions. The bond length is in Å.

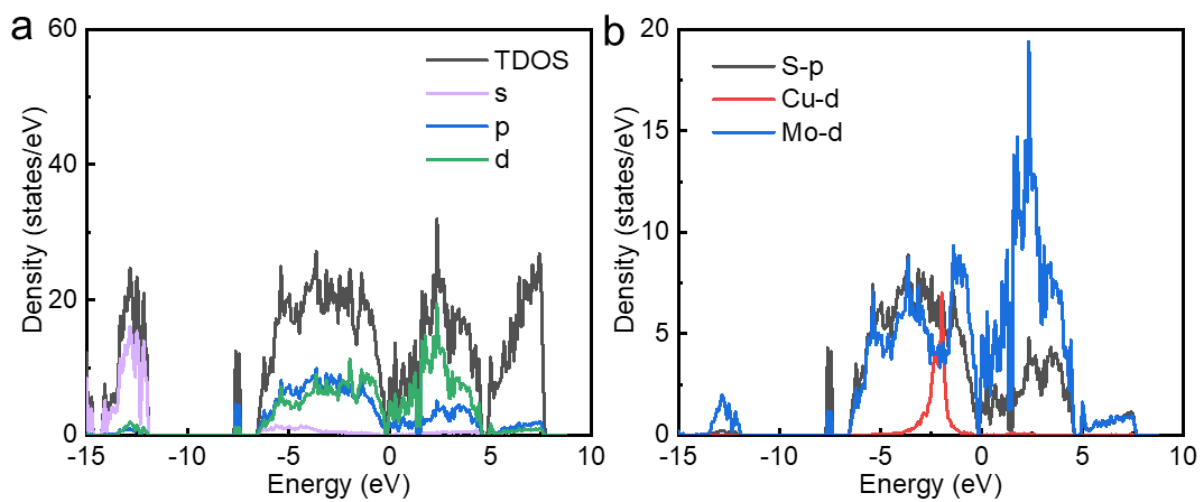

**Figure S6** PDOS of  $\text{Cu@MoS}_2\text{-Vs}$  in acidic condition.

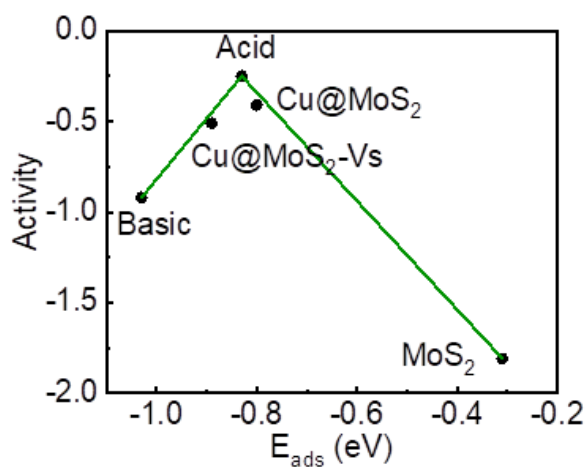

**Figure S7**  $\text{H}_2\text{O}_2$  decomposition reaction volcano plot for different  $\text{MoS}_2$  supported nanozymes.

**Table S1** S-S bonds, Mo-S bonds lengths and their average distance on  $\text{MoS}_2$  and  $\text{Cu@MoS}_2$  surfaces and Mo-Cu bond, Cu-S bonds lengths and their average distance on  $\text{Cu@MoS}_2$ .

| Distance (Å) | $\text{MoS}_2$ | $\text{Cu@MoS}_2$ |
|--------------|----------------|-------------------|
| S1-S2        | 3.245          | 3.341             |
| S2-S3        | 3.203          | 3.356             |
| S3-S1        | 3.245          | 3.341             |
| S-S average  | 3.231          | 3.346             |
| Mo1-S1       | 2.409          | 2.442             |
| Mo1-S2       | 2.466          | 2.570             |
| Mo1-S3       | 2.466          | 2.570             |
| Mo-S average | 2.447          | 2.527             |
| Mo1-Cu       | -              | 2.740             |
| S1-Cu        | -              | 2.274             |
| S2-Cu        | -              | 2.204             |
| S3-Cu        | -              | 2.204             |
| S-Cu average | -              | 2.23              |

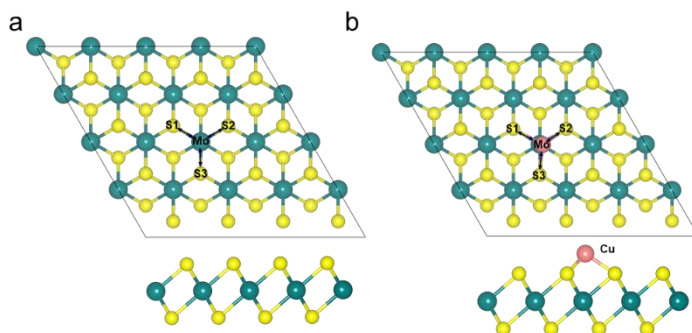

**Table S2** Adsorption energy ( $E_{\text{ads}}$ , eV) of  $\text{H}_2\text{O}_2$  molecule on different substrates.

| Substrate        | pure $\text{MoS}_2$ | $\text{Cu@MoS}_2$ | $\text{Cu@MoS}_2\text{-Vs}$ | $\text{Cu@MoS}_2\text{-Vs}$<br>in acid | $\text{Cu@MoS}_2\text{-Vs}$<br>in basic |
|------------------|---------------------|-------------------|-----------------------------|----------------------------------------|-----------------------------------------|
| $E_{\text{ads}}$ | -0.31               | -0.80             | -0.89                       | -0.83                                  | -1.03                                   |

The Cu loading surfaces have large adsorption energies (-0.80, -0.89, -0.83 and -1.03 eV for  $\text{Cu@MoS}_2$ ,  $\text{Cu@MoS}_2\text{-Vs}$ ,  $\text{Cu@MoS}_2\text{-Vs}$  in acid and  $\text{Cu@MoS}_2\text{-Vs}$  in basic, respectively) and much heat is released during the desorption and adsorption processes. According to the Gibbs free energy formula:  $\Delta G = \Delta H - T\Delta S$ , the difference of  $\Delta G$  for  $\text{H}_2\text{O}_2$  molecule in gas phase is -0.75 eV under 37 °C and 0 K. After redressing by  $\Delta G$ , the adsorption energy at 37 °C is -0.80 - (-0.75) eV = -0.05 eV, -0.89 - (-0.75) eV = -0.14 eV, -0.83 - (-0.75) eV = -0.08 eV, -1.03 - (-0.75) eV = -0.28 eV respectively for  $\text{Cu@MoS}_2$ ,  $\text{Cu@MoS}_2\text{-Vs}$ ,  $\text{Cu@MoS}_2\text{-Vs}$  in acid and  $\text{Cu@MoS}_2\text{-Vs}$  in basic, which are all less than 0 eV, indicating that  $\text{H}_2\text{O}_2$  molecule can be adsorbed on the surfaces. The temperature has little effect on the enzymatic activity for Cu loading surfaces. As for pure  $\text{MoS}_2$  surface ( $E_{\text{ads}} = -0.31$  eV), increasing the temperature will decrease the enzymatic activity. The activity of pure  $\text{MoS}_2$  will further decrease at high temperature, which also further confirms that the pure  $\text{MoS}_2$  surface is almost reactive inert. As a result, the methodological limitation on temperature did not affect the study results through the analysis above.

**Table S3** Adsorption energy ( $E_{\text{ads}}$ , eV) of Cu atom on different substrates.

| Substrate             | pure $\text{MoS}_2$ | $\text{Cu@MoS}_2$ | $\text{Cu@MoS}_2\text{-Vs}$ | $\text{Cu@MoS}_2\text{-Vs}$<br>in acid | $\text{Cu@MoS}_2\text{-Vs}$<br>in basic |
|-----------------------|---------------------|-------------------|-----------------------------|----------------------------------------|-----------------------------------------|
| $E_{\text{ads}}$ (eV) | -                   | -3.27             | -4.96                       | -3.74                                  | -2.79                                   |

**Table S4** Important bond lengths on  $\text{Cu@MoS}_2\text{-Vs}$  surfaces in neutral, acidic and basic conditions.

| Distance (Å)               | Neutral | Acid  | Basic |
|----------------------------|---------|-------|-------|
| S1-S2                      | 3.290   | 3.297 | 3.255 |
| S2-S3                      | 3.174   | 3.255 | 3.250 |
| S3-S1                      | 3.174   | 3.245 | 3.253 |
| S-S Average                | 3.213   | 3.265 | 3.253 |
| Mo1-Mo2                    | 3.670   | 3.513 | 3.510 |
| Mo2-Mo3                    | 3.670   | 3.721 | 2.800 |
| Mo3-Mo1                    | 3.453   | 3.769 | 2.803 |
| Mo-Mo Average              | 3.598   | 3.668 | 3.038 |
| Mo1-Cu                     | 2.644   | 2.638 | 2.218 |
| Mo2-Cu                     | 2.579   | 2.574 | 2.217 |
| Mo3-Cu                     | 2.645   | 2.651 | 2.120 |
| Mo-Cu Average<br>(or O-Cu) | 2.623   | 2.621 | 2.185 |
| S1-Cu                      | 3.461   | 3.572 | 3.031 |
| S2-Cu                      | 3.461   | 3.430 | 3.589 |
| S3-Cu                      | 3.665   | 3.379 | 3.587 |
| S-Cu Average<br>(or S-O)   | 3.529   | 3.460 | 3.402 |
| S-H1                       | -       | 1.362 | -     |
| S-H2                       | -       | 1.357 | -     |
| Mo3-Cu                     | -       | -     | 2.847 |
| S4-Cu                      | -       | -     | 2.123 |
| S5-Cu                      | -       | -     | 2.122 |
| O1-H1                      | -       | -     | 0.978 |
| O2-H2                      | -       | -     | 0.990 |
| O2-Cu                      | -       | -     | 1.660 |

**Table S5** Important bond lengths, angle and torsion of H<sub>2</sub>O<sub>2</sub> on pure MoS<sub>2</sub>, Cu@MoS<sub>2</sub> and Cu@MoS<sub>2</sub>-Vs surfaces in neutral, acidic and basic conditions.

| d (distance, Å),<br>or angle or<br>torsion | pure MoS <sub>2</sub> | Cu@MoS <sub>2</sub> | Cu@MoS <sub>2</sub> -Vs | Cu@MoS <sub>2</sub> -Vs-in-<br>acid | Cu@MoS <sub>2</sub> -Vs-in-<br>basic |
|--------------------------------------------|-----------------------|---------------------|-------------------------|-------------------------------------|--------------------------------------|
| O1-O2                                      | 1.463                 | 1.498               | 1.472                   | 1.495                               | 1.488                                |
| H1-O1                                      | 0.987                 | 0.982               | 0.984                   | 0.997                               | 1.009                                |
| H2-O2                                      | 0.986                 | 0.981               | 0.999                   | 0.981                               | 0.981                                |
| <H1O1O2                                    | 100.95                | 99.66               | 101.716                 | 101.943                             | 101.183                              |
| <H2O2O1                                    | 99.823                | 98.852              | 101.596                 | 98.914                              | 99.097                               |
| Torsion                                    | -100.365              | 124.194             | 93.044                  | 120.024                             | 114.16                               |
| O1-Cu                                      | -                     | 2.031               | 2.068                   | 2.045                               | 2.007                                |
| Cu-S1<br>(Cu-Mo1)                          | -                     | 2.303               | 2.711                   | 2.666                               | 2.161                                |
| Cu-S2<br>(Cu-Mo2)                          | -                     | 2.212               | 2.681                   | 2.619                               | 2.17                                 |
| Cu-S3<br>(Cu-Mo3)                          | -                     | 2.275               | 2.628                   | 2.706                               | -                                    |
